1 **Title:** VIGA: a sensitive, precise and automatic *de novo* Viral Genome Annotator.

2 **Running head:** *De novo* viral genome annotation

3 **Authors:** Enrique González-Tortuero<sup>1</sup>, Thomas David Sean Sutton<sup>1</sup>, Vimalkumar Velayudhan<sup>1</sup>,

4 Andrey Nikolaevich Shkoporov<sup>1</sup>, Lorraine Anne Draper<sup>1</sup>, Stephen Robert Stockdale<sup>1,2</sup>, Reynolds

5 Paul Ross<sup>1,3</sup>, Colin Hill<sup>1,3,\*</sup>

6

7 <sup>1</sup>APC Microbiome Ireland, University College Cork, Cork, Co. Cork, Ireland

8 <sup>2</sup>Teagasc Moorepark Food Research Centre, Fermoy, Co. Cork, Ireland

9 <sup>3</sup>School of Microbiology, University College Cork, Cork, Co. Cork, Ireland

10

11 \*To whom correspondence should be addressed

12

13 **Email addresses:**

14 EGT: [enrique.gonzalezortuero@ucc.ie](mailto:enrique.gonzalezortuero@ucc.ie); [enriquegleztortuero@gmail.com](mailto:enriquegleztortuero@gmail.com)

15 TDSS: [t.sutton@umail.ucc.ie](mailto:t.sutton@umail.ucc.ie)

16 VV: [mail@vimal.io](mailto:mail@vimal.io)

17 ANS: [andrey.shkoporov@ucc.ie](mailto:andrey.shkoporov@ucc.ie)

18 LAD: [l.draper@ucc.ie](mailto:l.draper@ucc.ie)

19 SRS: [stephen.stockdale@teagasc.ie](mailto:stephen.stockdale@teagasc.ie)

20 RPR: [p.ross@ucc.ie](mailto:p.ross@ucc.ie)

21 CH: [c.hill@ucc.ie](mailto:c.hill@ucc.ie)

22

23 **Abstract**

24 Viral (meta)genomics is a rapidly growing field of study that is hampered by an inability to annotate  
25 the majority of viral sequences; therefore, the development of new bioinformatic approaches is very  
26 important. Here, we present a new automatic *de novo* genome annotation pipeline, called VIGA, to  
27 annotate prokaryotic and eukaryotic viral sequences from (meta)genomic studies. VIGA was  
28 benchmarked on a database of known viral genomes and a viral metagenomics case study. VIGA  
29 generated the most accurate outputs according to the number of coding sequences and their  
30 coordinates, outputs also had a lower number of non-informative annotations compared to other  
31 programs.

32 **Keywords:** archaeal virus, bacteriophage, bioinformatics, *de novo* annotation, eukaryotic virus,  
33 genome annotation, metagenomics, viral genomics

## 34 **Introduction**

35 Virology is a diverse scientific discipline. While many researchers are interested in discovering and  
36 characterising pathogenic eukaryotic viruses [1], recently there has been an increased interest in  
37 revealing bacteria- and archaea-infecting viral communities [2]. The number of viral metagenomic  
38 studies is increasing due to the development of new sequencing technologies and the reduction in  
39 costs. However, due to the volume of information that these platforms generate and the large  
40 proportion of viral sequences sharing little or no homology to known viral genomes ('viral dark  
41 matter', [3]), new bioinformatic tools are required to examine viral contigs and genomes [4].

42

43 Viral annotation methods differ depending on the host organism. Bacteriophages and archaeal  
44 viruses are annotated using prokaryotic genome annotation software or web-servers such as RAST  
45 [5], Prokka [6] and RASTtk [7]. However, these bioinformatic tools are optimised for bacterial  
46 sequences, not viruses (despite the improvements in RASTtk to annotate phage sequences [8]). In  
47 contrast, eukaryotic viruses are annotated using close-reference based methods such as FLAN [9],  
48 VIGOR [10] and ViPR [11]. In a similar way, VirSorter [12] and VirusSeeker [13] were designed to  
49 predict putative prokaryotic viral contigs in metagenomic datasets. However, both programs predict  
50 viral contigs according to the presence of viral proteins using reference databases, and close-  
51 reference homology-based methods can underestimate true viral diversity due to database  
52 limitations [3,14]. Therefore, in this manuscript, we present a new modular and automatic *de novo*  
53 genome annotation bioinformatic pipeline, called VIGA (Viral Genome Annotator), to annotate  
54 viral sequences.

55

56 VIGA automatically detects open reading frames from a FASTA or multi-FASTA formatted file.  
57 VIGA then annotates protein sequences by detecting homologues in a BLAST ("Slow") or a  
58 DIAMOND ("Fast") protein database, with or without Hidden Markov Model (HMM) protein  
59 detection against a protein database. The different methodologies for annotating viral contigs and  
60 genomes allows the user to specify options that sacrifice annotation detail in exchange for increased  
61 speed, which is required when dealing with larger metagenomic datasets. In addition, VIGA also  
62 automatically detects (1) the topology of viral contigs, (2) the presence of rRNA, tRNA and tmRNA  
63 sequences, (3) potential CRISPR repeats and (4) tandem or inverted repeat sequences. Finally,  
64 VIGA outputs a FASTA file that includes user specified modifiers, a GenBank file and a five-  
65 column tab-delimited feature file to ease the upload of annotated contigs and genomes to various  
66 database repositories and genome visualisation platforms.

67

## 68 **Results**

### 69 **Benchmarking of VIGA**

70 The performance of VIGA, Prokka, RAST and RASTtk was tested using a benchmark database  
71 comprising 191 sequences belonging to 138 different viruses (52 bacteriophages, 72 eukaryotic and  
72 10 archaeal viruses, and 4 virophages; Additional file 1). Of the 72 eukaryotic viruses, 11 have  
73 multipartite genomes. Experimental evidence is available for the coding sequences of 117 out of the  
74 123 sequences of eukaryotic viruses, 28 out of 52 sequences of bacteriophages, 3 out of 10  
75 sequences of archaeal viruses, and none of the 4 virophage sequences used. When bioinformatic  
76 methods were used to annotate these viral genomes in the original data, a wide variety of methods  
77 were employed, including GeneMark [15], GLIMMER [16], NCBI ORF Finder and the University  
78 of Wisconsin Genetics Computer Group [17]. The outputs of VIGA, Prokka, RAST and RASTtk  
79 were evaluated according to three different parameters: (1) number of coding sequences, (2)  
80 coordinates of coding sequences, and (3) power of prediction.

81

82 Firstly, the accuracy and the precision of the number of viral coding sequences were estimated using  
83 general linear models. Accuracy was measured by the slope, and precision was measured according  
84 to the coefficient of determination ( $R^2$ ). To compare all these linear models, analysis of covariance  
85 (ANCOVA) was performed. In a general overview, the programs delivered different estimates of the  
86 number of coding sequences (ANCOVA:  $p < 2 \times 10^{-16}$ ). In fact, although all programs tended to  
87 overestimate the number of genes, VIGA provided the most accurate predictions (i.e. accuracy is  
88 closest to one, Fig. 1A). Moreover, VIGA and Prokka had very similar values of precision (Table 1).  
89 When compared according to viral host, similar results were found only in the case of eukaryotic  
90 viruses (ANCOVA (Archaeal viruses):  $p = 0.922$ ; ANCOVA (Bacteriophages):  $p = 0.734$ ; ANCOVA  
91 (Eukaryotic viruses):  $p = 1.560 \times 10^{-15}$ ; Figs. 1B-D). Interestingly, when bacteriophages were  
92 considered, only RASTtk tended to overestimate the number of coding sequences (Table 1).

93

94 Secondly,  $F_1$  score, a measure that combines precision and sensitivity, was used to predict the  
95 quality of the coordinates of the viral coding sequences. Moreover, to evaluate the occurrence of  
96 false positives (i.e. false coordinates considered as true; type I error) and false negatives (i.e. true  
97 coordinates considered as false; type II error), false discovery rate (FDR) and false negative rate  
98 (FNR) were examined. VIGA scored very highly for both bacteriophages and eukaryotic viruses. In  
99 eukaryotic viruses the highest false discovery rate (FDR) was associated with RASTtk, while RAST  
100 had the highest false negative rate (FNR). For bacteriophages the highest FDR and FNR were

101 obtained for Prokka. In the case of archaeal viruses, VIGA again had the highest precision, while  
102 the highest sensitivity was noted in RASTtk (Table 2).

103

104 Finally, the power of prediction of all programs was measured by considering the number of non-  
105 informative annotations (i.e. all proteins classified as “hypothetical protein”, “uncharacterized  
106 protein”, “ORF”, “predicted protein”, “unnamed product protein” or “gp[Number]”). For these  
107 analyses, two different modes of running VIGA were considered – “Slow” (when BLAST and  
108 HMMER are used to annotate the genes) and “Fast” (when DIAMOND alone is used for  
109 annotation). Kruskal-Wallis (KW) test was performed to detect potential differences in the power of  
110 prediction of all three programs (including both variants of VIGA) and significant differences  
111 between the various programs were observed (KW test:  $p = 1.683 \times 10^{-53}$ ). In all cases, no significant  
112 differences between VIGA-Slow and VIGA-Fast were found (Nemenyi test:  $p = 0.853$ ). In fact,  
113 while RAST and RASTtk had the highest number of non-informative annotations, both VIGA  
114 modes had the smallest number (Fig. 2A). Additionally, there were significant differences among  
115 programs independently of the viral type (Table 3). In all cases, VIGA achieved optimal annotation,  
116 having always the smallest number of non-informative annotations. In contrast, Prokka had the  
117 highest amount of non-informative annotations in prokaryotic viruses (Figs. 2B-C) and RAST and  
118 RASTtk had the highest amount of non-informative descriptions in eukaryotic viruses (Fig. 2D).

119

#### 120 **Case study: healthy human gut phageome**

121 To evaluate the performance of VIGA on a metagenomic dataset, VIGA, Prokka, RAST and  
122 RASTtk were run using a subset of 202 non-redundant contigs from the metavirome of healthy  
123 individuals [18]. VIGA was executed using 10 cores in two different ways: (1) using only  
124 DIAMOND (VIGA-Fast), and (2) using BLAST and HMMER (VIGA-Slow). These 202 contigs  
125 were composed of 65 short contigs (<15 kb), 99 medium-size contigs (15 – 70 kb), and 38 long  
126 contigs (>70 kb). Two different parameters were evaluated: (1) Speed of the program, and (2) power  
127 of prediction. Only RASTtk was unable to annotate these contigs.

128

129 To test the speed of VIGA-Slow and VIGA-Fast, both VIGA modes and Prokka were run in a local  
130 server (Lenovo x3650 M5, with 48 Intel Xeon 2.6GHz Processors, Ubuntu 14.04, 512 GB of RAM)  
131 using 10 processors. VIGA-Slow took 19,283 minutes (13 days 9 hours 23 minutes) to process all  
132 202 contigs of this data set, while VIGA-Fast took 809 minutes (13 hours 29 minutes). In contrast,  
133 Prokka took 3 minutes to annotate all contigs. Unfortunately, we cannot estimate the time that  
134 RAST took to annotate these genomes due to be an external web server.

135

136 Finally, the power of prediction of all programs was evaluated by comparing the number of non-  
137 informative annotations as indicated above. Significant differences between the various programs  
138 were observed (KW test:  $p = 2.121 \times 10^{-93}$ ). While Prokka had the highest percentage of non-  
139 informative descriptions, VIGA-Slow had the smallest number (Fig. 3A). In contrast to the  
140 benchmark, there were significant differences between VIGA-Slow and VIGA-Fast on a  
141 metagenomic dataset. VIGA-FAST had a higher percentage of non-informative descriptions than  
142 VIGA-Slow (Nemenyi test:  $p = 3.900 \times 10^{-14}$ ). Surprisingly, no significant differences between  
143 VIGA-Fast and RAST were found (Nemenyi test:  $p = 0.440$ ; Fig. 3A). When the different size of  
144 contigs were considered, significant differences between the non-informative annotations of the  
145 programs were found (KW test (“Short”):  $p = 4.650 \times 10^{-24}$ ; KW test (“Medium”):  $p = 3.731 \times 10^{-63}$ ;  
146 KW test (“Long”):  $p = 8.708 \times 10^{-16}$ ). This is a similar pattern detected independently of the contig  
147 size (Figs. 3B-D).

148

## 149 **Discussion**

150 In this study, VIGA, a new bioinformatic pipeline for viral genome annotation, was tested against  
151 RAST, RASTtk and Prokka using a benchmark comprising of 138 viruses. In fact, this is the first  
152 genome annotation pipeline to be benchmarked using viral data, as previous validation of these  
153 programs tended towards the use of bacterial genomes [5,6]. When all these bioinformatic  
154 annotation pipelines were benchmarked, VIGA successfully outperformed the others in all test  
155 parameters. After validating VIGA, it was used to annotate the phages in a subset of the Manrique  
156 et al. healthy human gut phageome dataset [18]. This subset was based on the phages predicted by  
157 VirSorter [12], which could miss some viral contigs such as variants of crAssphage [19]. In that  
158 instance, this viral gene annotation is dependant on the proficiency of VirSorter.

159

160 When the benchmark of 138 viruses was performed to measure the accuracy and precision of the  
161 number of coding sequences, VIGA had the highest values of accuracy and precision in the general  
162 overview. The only differences in the number of coding sequences were shown in eukaryotic  
163 viruses. Additionally, when the quality of the coordinates of these coding sequences was analysed,  
164 RASTtk had the highest false discovery rate and RAST the highest false negative rate for  
165 eukaryotic viruses. All these observations strengthen the idea that all tested programs were  
166 developed for prokaryotic viruses. Although the most abundant viruses in the biosphere are  
167 bacteriophages [20], it was not possible to annotate around 80% of putative viral contigs in previous  
168 studies on viral diversity [14], indicating the extensive presence of ‘viral dark matter’. The nature of

169 this ‘viral dark matter’ is related with the lack of knowledge in viral diversity, and due to the use of  
170 homology-search methods to classify and to annotate them [3]. In that sense, classification of  
171 viruses (independently of their hosts) currently should not only be performed using close-reference  
172 based homology searches because they could underestimate the real viral diversity based on the  
173 limitations of databases.

174

175 The quality of the coordinates of the coding sequences in the viral benchmark was higher using  
176 VIGA than with the other programs. Although this result suggests that VIGA is reliable, it is also  
177 important to note that there was only experimental evidence of the coding sequences in 68 of 74  
178 sequences of eukaryotic viruses, 28 of 52 sequences of bacteriophages, and 3 of 10 sequences of  
179 archaeal viruses. In fact, although the development of automatic genomic pipelines such as RASTtk  
180 or VIGA can facilitate the prediction of genes in viral sequences, some features such as introns,  
181 morons or regulatory elements need manual refinement [8]. For this reason, all bioinformatic  
182 genome annotations are putative until validated using experimental procedures such as cDNA-  
183 gDNA hybridization [21–23], proteomics [24–26] or transcriptomics [27–29].

184

185 Analysis of the power of prediction of annotation pipelines showed that RAST and RASTtk tend to  
186 generate a higher number of non-informative annotations, while VIGA had the smallest number in  
187 all cases. Therefore, VIGA-Slow mode has the potential to provide more information on encoded  
188 viral genes than other genome annotation bioinformatic pipelines, which rely exclusively on  
189 homology-based methods such as BLAST, BLAT [30] or DIAMOND. Primarily because these  
190 methods increase the number of non-informative annotations, especially in novel viruses, as  
191 demonstrated in the described metagenomic case study. Viral dark matter [3], or the unknown  
192 fraction of the virome, is a prevalent hurdle in virome research and lack of homology to sequences  
193 in databases hampers most annotation methods. It is also important to note, that where annotations  
194 are available, many have been generated through bioinformatics and do not have supporting  
195 experimental evidence. It is therefore very important to consider the source of functional  
196 information for proteins when annotating new viruses unless empirical evidence is available [8,31].

197

198 Proteins related to viral function can have highly conserved sequences, such as the hepatitis B virus  
199 core protein [32], Dengue virus polyprotein [33] and the influenza A virus nucleoprotein [34],  
200 because non-synonymous mutations in these proteins could hamper viral function. For this reason,  
201 the use of HMMs was implemented to predict the putative function of these genes. Use of HHPred  
202 or InterProScan is suggested to increase the power of protein annotation predictions [31,35,36].



203 Although the implementation of these programs could be beneficial for VIGA and it will be  
204 implemented in future versions, HMM-based methods are slower than homology searches as noted  
205 in the case study. Another alternative to these HMM-based methods could be the implementation of  
206 homology-independent annotation methods such as iVIREONS [37] or VIRALpro [38]. All these  
207 methods use machine learning to predict structural phage proteins such as capsid, collar and tail  
208 proteins [8] and are also scheduled for implementation in future versions of VIGA. Finally, when  
209 the power of prediction of all genome annotation pipelines was analysed, a lack of criteria for gene  
210 annotations was found, making it difficult to compare between the outputs of the different  
211 programs. For this reason, the implementation of a standardised genome annotation system would  
212 ease the comparison between genomes [39,40] using some (alpha)numerical classifications such as  
213 the Enzyme Codes [41], Clusters of Orthologous Groups [42], KEGG Orthology [43] or the  
214 Prokaryotic Viral Orthologous Groups [44] which could be added in the genome annotation output.  
215

## 216 **Conclusions**

217 The number of viral metagenomic studies is increasing as a consequence of the development of  
218 high throughput sequencing platforms and cost reductions. However, there are few software  
219 programs to annotate the viral sequences and never before have these programs been benchmarked  
220 against each other. In this study, we present VIGA, a new automatic *de novo* genome annotation  
221 bioinformatic pipeline to annotate prokaryotic and eukaryotic viral sequences from genomic and  
222 metagenomic studies. VIGA allows the most accurate, precise and sensitive annotation of viral  
223 genomes when benchmarked using 138 known viral genomes. VIGA can be executed using BLAST  
224 or DIAMOND to annotate proteins according to homology, with the option to also use HMMER to  
225 improve these annotations based on HMMs. The use of HMMs will enrich the annotation detail of  
226 the viral contigs, but will decrease the speed of the program. Where increased speed is required for  
227 example when dealing with larger metagenomics datasets.  
228

## 229 **Materials and methods**

### 230 **Workflow of the software**

231 *Overview.* VIGA is an automatic *de novo* viral genome annotator implemented in Python 2.7  
232 (requiring Biopython [45]) and designed to annotate complete and draft viral and phage genomes  
233 comprising single or multiple contigs (Fig. 4). As an input, VIGA accepts a DNA FASTA file with  
234 the (putative) viral contigs. These sequences are processed to predict the topology of the contigs  
235 (i.e. circular or linear). If the contig is circular, the prediction of the origin of replication is



236 performed according to cumulative GC skew and realignment of the contig from the putative origin  
237 of replication. Coding sequences (CDS) are predicted and, then, the function of these proteins is  
238 inferred based on homology using BLAST [46] or DIAMOND [47] and, optionally, using Hidden  
239 Markov Models (HMMER [48]). After that, a decision tree algorithm chooses the most reliable  
240 description of the protein (Fig. 5). Potential rRNA sequences are predicted using INFERNAL [49]  
241 with the use of the Rfam database [50], and tRNA and tmRNA sequences are predicted using  
242 ARAGORN [51]. Additionally, CRISPR, tandem and inverted repeats are predicted using PILER-  
243 CR [52], Tandem Repeats Finder [53] and Inverted Repeats Finder [54] respectively. Repeat  
244 sequences are related with the gene expression regulation, integration of the viral genome and,  
245 even, viral replication. Finally, the output of the program are a GenBank file, a FASTA file and a  
246 table (TBL) file suitable for GenBank submission (Fig. 4). Optionally, a General Feature Format  
247 (GFF) version 3 file can be generated.

248

249 *Contig shape prediction.* VIGA requires a FASTA file containing a single or multiple sequences of  
250 viral contigs. Before running the gene prediction, VIGA launches LASTZ [55] to predict the  
251 circularity of every contig. In this case, a contig is defined as circular when the similarity between  
252 the initial and terminal fragment of the contig (by default the first and last 101 bp) is more than 95%  
253 and the length of such alignment covers more than 40%. When the contig is predicted as a circular,  
254 the software will predict the origin of replication based on iREP [56], which predicts the origin and  
255 terminus according to the cumulative GC skew.

256

257 *Gene prediction.* To predict genes in the contig, its length is checked and the most suitable program  
258 is run. If a contig is larger than 100,000 bp, Prodigal [57] is executed to predict the genes. If not,  
259 MetaProdigal [58] is launched to predict the genes. In both cases, when there are linear contigs, the  
260 programs are optimised to avoid predicting genes in regions near the closed ends of the contig.  
261 After the gene prediction, the coordinates and the protein sequence are saved.

262

263 *Function prediction.* Protein sequences are analysed using BLASTP [59] to predict its function  
264 according to homology. By default, BLASTP is run with default parameters (except for the *e*-value,  
265 which has been changed to  $10^{-5}$  by default). However, an exhaustive BLASTP search could be  
266 performed using very strict values (a word size of 2, a gap open of 8, a gap extend of 2, the PAM70  
267 matrix instead of BLOSUM62 and no compositional based statistics) to accurately identify proteins  
268 [60]. Alternatively, DIAMOND [47] can be used to predict protein function according to homology.  
269 For a more accurate protein function prediction, HMMER [48] can be executed to predict functions

270 according to Hidden Markov Models with default parameters, except for the inclusion of an *e*-value  
271 cut-off of 0.001. To increase the protein function prediction speed, BLASTP can be launched using  
272 multiple threads and HMMER can run multiple jobs using GNU Parallel [61]. Both outputs are  
273 parsed independently according to identity, coverage, *e*-value and description to retrieve the protein  
274 function minimising the number of non-informative annotations as defined later.

275

276 *Decision tree algorithm.* If BLAST or DIAMOND were executed with HMMER to predict protein  
277 function, the BLAST/DIAMOND and HMMER outputs are processed using a decision tree to  
278 retrieve the description of every protein in the contig. For each protein, the existence of hits in both  
279 programs is checked. When the protein is detected in both BLAST and HMMER, non-informative  
280 annotations are detected searching for the expressions “hypothetical protein”, “uncharacterized  
281 protein”, “ORF”, “predicted protein”, “unnamed product protein” or “gp[Number]” in their BLAST  
282 and HMMER descriptions. If such a description is present in both proteins, the protein will be  
283 described as “hypothetical protein”. However if the “hypothetical protein” description is only  
284 present in BLAST, the consequent annotation retrieved by HMMER is considered as a valid one,  
285 and *vice versa*. In the scenario where the protein is not labelled as “hypothetical protein” in either  
286 BLAST or HMMER, it is checked if the percentage identity and coverage is higher in BLAST or in  
287 HMMER. Depending of these results, BLAST output or HMMER output is chosen accordingly  
288 (Fig. 5).

289

290 *rRNA prediction.* INFERNAL [49] is used altogether with the Rfam database [50] to predict the  
291 different ribosomal genes in every contig. In this case, INFERNAL hits are reported according to  
292 the gathering (GA) scores for every model.

293

294 *tRNA prediction.* ARAGORN [51] is launched to predict all tRNA and tmRNA sequences in every  
295 contig. After this step, the coordinates and the description of the tRNA are saved.

296

297 *CRISPR, tandem and inverted repeats prediction.* PILER-CR [52], Tandem Repeats Finder [53] and  
298 Inverted Repeats Finder [54] are used to detect CRISPR, direct tandem and inverted repeats in the  
299 contig, respectively.

300

301 *Output files.* After running all described steps, all saved information (contig shape, contig sequence,  
302 protein coordinates, protein sequences, protein descriptions, rRNA and tRNA coordinates, tRNA  
303 descriptions, and tandem and inverted repeats coordinates) is written to a GenBank file.

304 Additionally, the GenBank file is also converted to FASTA and TBL files after retrieving the  
305 metadata from a plain text file. The FASTA and the TBL files are suitable for GenBank submission.  
306 Optionally, a GFF file can also be created with this information.

307

### 308 **Benchmarking of VIGA**

309 *Bioinformatic analysis.* 138 different viruses (52 bacteriophages, 72 eukaryotic and 10 archaeal  
310 viruses, and 4 virophages) which comprises 191 sequences (Additional file 1) were used to validate  
311 VIGA. Additionally, these sequences were also submitted to Prokka [6], RAST [5] and RASTtk [7]  
312 to compare their performance with VIGA. In this case, VIGA was launched in two different ways.  
313 First, VIGA was executed using BLAST [46] and HMMER [48] to predict protein function in the  
314 VIGA-Slow mode and then, launched using only DIAMOND [47] as the VIGA-Fast mode to  
315 predict protein function. In both cases, *nr* and UniProt databases were considered for  
316 DIAMOND/BLAST and HMMER, respectively.

317

318 *Statistical tests.* To evaluate the performance of VIGA, three different analyses were done. Firstly,  
319 to infer the accuracy and the precision of the number of viral coding sequences, general linear  
320 models were used. All linear models were forced to have intercept zero. The slope was used to  
321 measure the accuracy, while the  $R^2$  was used to measure the precision. Additionally, ANCOVA was  
322 used to compare the linear models. Secondly, the prediction quality of the coordinates of the viral  
323 coding sequences was evaluated by the  $F_1$  score, the precision and sensitivity, defined as

$$F_1 \text{ score} = \frac{2 \times TP}{(2 \times TP + FP + FN)},$$

$$\text{Precision} = \frac{TP}{(TP + FP)},$$

$$\text{Sensitivity} = \frac{TP}{(TP + FN)},$$

324

325 where TP indicates the number of true positives, FP the number of false positives and FN the  
326 number of false negatives. FDR and FNR were considered to measure the type I (i.e. false  
327 coordinates were considered as true coordinates) and the type II (i.e. true coordinates were  
328 considered as false coordinates) errors, respectively. To evaluate differences in the power of  
329 prediction of all programs, Kruskal-Wallis test was performed. In case that there were differences  
330 between programs, *post-hoc* tests using Nemenyi tests were performed. All statistical tests were  
331 carried out at an alpha level of 0.05 and were performed in R v. 3.4.1 [62] using the *HH* [63] and  
332 the *PMCMR* [64] packages.

333

### 334 **Case study: healthy human gut phageome**

335 *Bioinformatic analysis.* VIGA was also tested on a metagenomic dataset using published data from  
336 the health human gut phageome [18]. This data set was downloaded from the SRA webpage (SRR  
337 codes: SRR4295172 – SRR4295175) and processed to retrieve contigs per sample. First, adapters  
338 were removed using Cutadapt 1.9.1 [65] and low-quality bases (lower than a PHRED score of 20  
339 for a 4 bp sliding window) were trimmed using Trimmomatic [66]. All reads shorter than 30 bp  
340 were not considered for further analyses. All potential human reads were removed after being  
341 identified with Kraken v. 0.10.5 [67]. Contigs were assembled using metaSPAdes v. 3.10.0 [68] as  
342 recently the use of metaSPAdes was highly recommended to assemble metaviromes [69].  
343 Assemblies of each sample were made non-redundant by an all-vs-all BLASTN [46] considering an  
344  $e$ -value of  $10^{-6}$ . A contig was deemed redundant when it is shared 90% of its identity over 90% of  
345 the contig length. In these cases, the longer of the two contigs was retained. Non-redundant contigs  
346 over 1,000bp were processed using VirSorter [12] to generate a final data set of viral metagenome  
347 sequences. These contigs were annotated using VIGA in the two different ways described in the  
348 ‘Benchmarking of VIGA’ subsection and Prokka using 10 cores. Time benchmarking was  
349 performed using the *time* command in Linux only for VIGA and Prokka, as RAST and RASTtk are  
350 online genome annotation services.

351

352 *Statistical tests.* To evaluate differences in the power of prediction of all programs, Kruskal-Wallis  
353 test and *post-hoc* tests using Nemenyi tests were performed as described before. Moreover, to  
354 discard the effect of the length size of contigs as a potential factor of the power of prediction,  
355 Kruskal-Wallis tests were performed after classifying the contigs in three groups: “short” (<15 kb),  
356 “medium” (15 – 70 kb), and “long” (>70 kb). All statistical tests were carried out at an alpha level  
357 of 0.05 and were performed in R v. 3.4.1 [62] using the *HH* [63] and the *PMCMR* [64] packages.

358

### 359 **Declarations**

360 **Ethics approval and consent to participate.** Not applicable.

361 **Consent for publication.** Not applicable.

362 **Availability of data and material.** Source code of VIGA (and the wrapper for the Galaxy platform)  
363 is available for download at <https://github.com/EGTortuero/viga>, implemented in Python 2.7, and  
364 supported on Linux, under the GPL3 licence. The program is also available as at Docker image  
365 (<https://hub.docker.com/r/vimalkvn/viga/>).

366 **Competing interests.** The authors declare that they have no competing interests.

367 **Funding.** This publication has emanated from research conducted with the financial support of  
368 Science Foundation Ireland (SFI) under Grant Number SFI/15/ERC/D/3189. Author contributions  
369 were also made by individuals in receipt of the financial support of SFI under Grant Number  
370 SFI/12/RC/2273, a SFI's Spokes Programme which is co-funded under the European Regional  
371 Development Fund under Grant Number SFI/14/SP APC/B3032, and a research grant from Janssen  
372 Biotech, Inc.

373 **Authors' contributions.** LAD and SRS conceived the original idea. EGT and VV developed and  
374 wrote the VIGA software and the Galaxy wrapper. VV wrote the Docker integration of VIGA. EGT,  
375 LAD, SRS and CH designed the benchmark study. EGT and ANS tested VIGA against the  
376 validation benchmark. TDSS, EGT and ANS designed and run the case study. EGT, TDSS and SRS  
377 wrote the manuscript, with comments and editing by ANS, LAD, CH and RPR. All authors read and  
378 approved the final manuscript.

379 **Acknowledgements.** EGT wants to thank Dr. Aditya Upadrasta for help in improving the software  
380 and Dr. Andrei Sorin Bolocan, Dr. Adam Clooney and Dr. Feargal J. Ryan for discussions.

381

## 382 **References**

- 383 1. Miller RR, Montoya V, Gardy JL, Patrick DM, Tang P, Chambers S, et al. Metagenomics for  
384 pathogen detection in public health. *Genome Med.* 2013;5:81.
- 385 2. Simmonds P, Adams MJ, Benkó M, Breitbart M, Brister JR, Carstens EB, et al. Consensus  
386 statement: Virus taxonomy in the age of metagenomics. *Nat. Rev. Microbiol.* 2017;15:161–8.
- 387 3. Krishnamurthy SR, Wang D. Origins and challenges of viral dark matter. *Virus Res.*  
388 2017;239:136–42.
- 389 4. Mitchell A, Bucchini F, Cochrane G, Denise H, Hoopen P ten, Fraser M, et al. EBI metagenomics  
390 in 2016 – an expanding and evolving resource for the analysis and archiving of metagenomic data.  
391 *Nucleic Acids Res.* 2016;44:D595–603.
- 392 5. Aziz RK, Bartels D, Best AA, DeJongh M, Disz T, Edwards RA, et al. The RAST Server: Rapid  
393 Annotations using Subsystems Technology. *BMC Genomics* 2008;9:75.
- 394 6. Seemann T. Prokka: rapid prokaryotic genome annotation. *Bioinformatics* 2014;30:2068–9.
- 395 7. Brettin T, Davis JJ, Disz T, Edwards RA, Gerdes S, Olsen GJ, et al. RASTtk: a modular and  
396 extensible implementation of the RAST algorithm for building custom annotation pipelines and  
397 annotating batches of genomes. *Sci. Rep.* 2015;5:8365.

- 398 8. McNair K, Aziz RK, Pusch GD, Overbeek R, Dutilh BE, Edwards R. Phage genome annotation  
399 using the RAST pipeline. In Clokie M, Kropinski A, Lavigne R, editors. Bacteriophages. Methods  
400 in molecular biology. New York: Humana Press; 2018. p. 231–8.
- 401 9. Bao Y, Bolotov P, Dernovoy D, Kiryutin B, Tatusova T. FLAN: A web server for influenza virus  
402 genome annotation. *Nucleic Acids Res.* 2007;35:W280–4.
- 403 10. Wang S, Sundaram JP, Stockwell TB. VIGOR extended to annotate genomes for additional 12  
404 different viruses. *Nucleic Acids Res.* 2012;40:W186–92.
- 405 11. Pickett BE, Sadat EL, Zhang Y, Noronha JM, Squires RB, Hunt V, et al. ViPR: an open  
406 bioinformatics database and analysis resource for virology research. *Nucleic Acids Res.*  
407 2012;40:D593-8.
- 408 12. Roux S, Enault F, Hurwitz BL, Sullivan MB. VirSorter: mining viral signal from microbial  
409 genomic data. *PeerJ* 2015;3:e985.
- 410 13. Zhao G, Wu G, Lim ES, Droit L, Krishnamurthy S, Barouch DH, et al. VirusSeeker, a  
411 computational pipeline for virus discovery and virome composition analysis. *Virology*  
412 2017;503:21–30.
- 413 14. Aggarwala V, Liang G, Bushman FD. Viral communities of the human gut: metagenomic  
414 analysis of composition and dynamics. *Mob. DNA* 2017;8:12.
- 415 15. Besemer J, Borodovsky M. GeneMark: web software for gene finding in prokaryotes,  
416 eukaryotes and viruses. *Nucleic Acids Res.* 2005;33:W451-4.
- 417 16. Delcher AL, Harmon D, Kasif S, White O, Salzberg SL. Improved microbial gene identification  
418 with GLIMMER. *Nucleic Acids Res.* 1999;27:4636–41.
- 419 17. Devereux J, Haeberli P, Smithies O. A comprehensive set of sequence analysis programs for the  
420 VAX. *Nucleic Acids Res.* 1984;12:387–95.
- 421 18. Manrique P, Bolduc B, Walk ST, van der Oost J, de Vos WM, Young MJ. Healthy human gut  
422 phageome. *Proc. Natl. Acad. Sci. U. S. A.* 2016;113:10400–5.
- 423 19. Ren J, Ahlgren NA, Lu YY, Fuhrman JA, Sun F. VirFinder: a novel *k*-mer based tool for  
424 identifying viral sequences from assembled metagenomic data. *Microbiome* 2017;5:69.
- 425 20. Clokie MR, Millard AD, Letarov A V, Heaphy S. Phages in nature. *Bacteriophage* 2011;1:31–  
426 45.
- 427 21. Todd D, Weston JH, Mawhinney KA, Laird C. Characterization of the genome of avian  
428 encephalomyelitis virus with cloned cDNA fragments. *Avian Dis.* 1999;43:219–26.
- 429 22. Jiang D, Ghabrial SA. Molecular characterization of *Penicillium chrysogenum* virus:  
430 reconsideration of the taxonomy of the genus Chrysovirus. *J. Gen. Virol.* 2004;85:2111–21.
- 431 23. Chiba S, Salaipeth L, Lin Y-H, Sasaki A, Kanematsu S, Suzuki N. A novel bipartite double-  
432 stranded RNA Mycovirus from the white root rot Fungus *Rosellinia necatrix*: molecular and



- 433 biological characterization, taxonomic considerations, and potential for biological control. *J. Virol.*  
434 2009;83:12801–12.
- 435 24. Kramer T, Greco TM, Enquist LW, Cristea IM. Proteomic characterization of pseudorabies virus  
436 extracellular virions. *J. Virol.* 2011;85:6427–41.
- 437 25. Lété C, Palmeira L, Leroy B, Mast J, Machiels B, Wattiez R, et al. Proteomic characterization of  
438 bovine herpesvirus 4 extracellular virions. *J. Virol.* 2012;86:11567–80.
- 439 26. Chan Y-W, Millard AD, Wheatley PJ, Holmes AB, Mohr R, Whitworth AL, et al. Genomic and  
440 proteomic characterization of two novel siphovirus infecting the sedentary facultative epibiont  
441 cyanobacterium *Acaryochloris marina*. *Environ. Microbiol.* 2015;17:4239–52.
- 442 27. Josset L, Zeng H, Kelly SM, Tumpey TM, Katze MG. Transcriptomic characterization of the  
443 novel avian-origin influenza A (H7N9) virus: specific host response and responses intermediate  
444 between avian (H5N1 and H7N7) and human (H3N2) viruses and implications for treatment  
445 options. *MBio* 2014;5:e01102-13.
- 446 28. Sun X, Wang Z, Gu Q, Li H, Han W, Shi Y. Transcriptome analysis of *Cucumis sativus* infected  
447 by Cucurbit chlorotic yellows virus. *Virol. J.* 2017;14:18.
- 448 29. Tombácz D, Balázs Z, Csabai Z, Moldován N, Szücs A, Sharon D, et al. Characterization of the  
449 dynamic transcriptome of a herpesvirus with long-read single molecule real-time sequencing. *Sci.*  
450 *Rep.* 2017;7:43751.
- 451 30. Kent WJ. BLAT—The BLAST-Like Alignment Tool. *Genome Res.* 2002;12:656–64.
- 452 31. Aziz RK, Ackermann H-W, Petty NK, Kropinski AM. Essential steps in characterizing  
453 bacteriophages: Biology, taxonomy, and genome analysis. In Clokie M, Kropinski A, Lavigne R,  
454 editors. *Bacteriophages. Methods in molecular biology.* New York: Humana Press; 2018. p. 197–  
455 215.
- 456 32. Chain BM, Myers R. Variability and conservation in hepatitis B virus core protein. *BMC*  
457 *Microbiol.* 2005;5:33.
- 458 33. Khan AM, Miotto O, Nascimento EJM, Srinivasan KN, Heiny AT, Zhang GL, et al.  
459 Conservation and variability of dengue virus proteins: Implications for vaccine design. *PLoS Negl.*  
460 *Trop. Dis.* 2008;2:e272.
- 461 34. Babar MM, Zaidi N-SS. Protein sequence conservation and stable molecular evolution reveals  
462 influenza virus nucleoprotein as a universal druggable target. *Infect. Genet. Evol.* 2015;34:200–10.
- 463 35. Kuchibhatla DB, Sherman WA, Chung BYW, Cook S, Schneider G, Eisenhaber B, et al.  
464 Powerful sequence similarity search methods and in-depth manual analyses can identify remote  
465 homologs in many apparently “orphan” viral proteins. *J. Virol.* 2014;88:10–20.
- 466 36. Jones P, Binns D, Chang HY, Fraser M, Li W, McAnulla C, et al. InterProScan 5: Genome-scale  
467 protein function classification. *Bioinformatics* 2014;30:1236–40.



- 468 37. Seguritan V, Alves N, Arnoult M, Raymond A, Lorimer D, Burgin AB, et al. Artificial neural  
469 networks trained to detect viral and phage structural proteins. *PLoS Comput. Biol.*  
470 2012;8:e1002657.
- 471 38. Galiez C, Magnan CN, Coste F, Baldi P. VIRALpro: a tool to identify viral capsid and tail  
472 sequences. *Bioinformatics* 2016;32:1405–7.
- 473 39. Klimke W, O’Donovan C, White O, Brister JR, Clark K, Fedorov B, et al. Solving the problem:  
474 Genome annotation standards before the data deluge. *Stand. Genomic Sci.* 2011;5:168–93.
- 475 40. Tripp HJ, Sutton G, White O, Wortman J, Pati A, Mikhailova N, et al. Toward a standard in  
476 structural genome annotation for prokaryotes. *Stand. Genomic Sci.* 2015;10:45.
- 477 41. McDonald AG, Tipton KF. Fifty-five years of enzyme classification: advances and difficulties.  
478 *FEBS J.* 2014;281:583–92.
- 479 42. Tatusov RL, Galperin MY, Natale DA, Koonin E V. The COG database: a tool for genome-scale  
480 analysis of protein functions and evolution. *Nucleic Acids Res.* 2000;28:33–6.
- 481 43. Kanehisa M, Sato Y, Kawashima M, Furumichi M, Tanabe M. KEGG as a reference resource  
482 for gene and protein annotation. *Nucleic Acids Res.* 2016;44:D457–62.
- 483 44. Grazziotin AL, Koonin E V, Kristensen DM. Prokaryotic Virus Orthologous Groups (pVOGs): a  
484 resource for comparative genomics and protein family annotation. *Nucleic Acids Res.*  
485 2017;45:D491–8.
- 486 45. Cock PJA, Antao T, Chang JT, Chapman BA, Cox CJ, Dalke A, et al. Biopython: Freely  
487 available Python tools for computational molecular biology and bioinformatics. *Bioinformatics*  
488 2009;25:1422–3.
- 489 46. Camacho C, Coulouris G, Avagyan V, Ma N, Papadopoulos J, Bealer K, et al. BLAST+:  
490 architecture and applications. *BMC Bioinformatics.* 2009;10:421.
- 491 47. Buchfink B, Xie C, Huson DH. Fast and sensitive protein alignment using DIAMOND. *Nat.*  
492 *Methods* 2014;12:59–60.
- 493 48. Finn RD, Clements J, Eddy SR. HMMER web server: Interactive sequence similarity searching.  
494 *Nucleic Acids Res.* 2011;39:W29–W37.
- 495 49. Nawrocki EP, Eddy SR. Infernal 1.1: 100-fold faster RNA homology searches. *Bioinformatics*  
496 2013;29:2933–5.
- 497 50. Nawrocki EP, Burge SW, Bateman A, Daub J, Eberhardt RY, Eddy SR, et al. Rfam 12.0: updates  
498 to the RNA families database. *Nucleic Acids Res.* 2015;43:D130–7.
- 499 51. Laslett D, Canback B. ARAGORN, a program to detect tRNA genes and tmRNA genes in  
500 nucleotide sequences. *Nucleic Acids Res.* 2004;32:11–6.
- 501 52. Edgar RC. PILER-CR: fast and accurate identification of CRISPR repeats. *BMC Bioinformatics*  
502 2007;8:18.

- 503 53. Benson G. Tandem repeats finder: a program to analyze DNA sequences. *Nucleic Acids Res.*  
504 1999;27:573–80.
- 505 54. Warburton PE, Giordano J, Cheung F, Gelfand Y, Benson G. Inverted repeat structure of the  
506 human genome: the X-chromosome contains a preponderance of large, highly homologous inverted  
507 repeats that contain testes genes. *Genome Res.* 2004;14:1861–9.
- 508 55. Harris RS. Improved pairwise alignment of genomic DNA. The Pennsylvania State University;  
509 2007.
- 510 56. Brown CT, Olm MR, Thomas BC, Banfield JF. Measurement of bacterial replication rates in  
511 microbial communities. *Nat. Biotechnol.* 2016;34:1256–63.
- 512 57. Hyatt D, Chen G-L, Locascio PF, Land ML, Larimer FW, Hauser LJ. Prodigal: prokaryotic gene  
513 recognition and translation initiation site identification. *BMC Bioinformatics* 2010;11:119.
- 514 58. Hyatt D, Locascio PF, Hauser LJ, Uberbacher EC. Gene and translation initiation site prediction  
515 in metagenomic sequences. *Bioinformatics.* 2012;28:2223–30.
- 516 59. Altschul SF, Madden TL, Schäffer AA, Zhang J, Zhang Z, Miller W, et al. Gapped BLAST and  
517 PSI-BLAST: a new generation of protein database search programs. *Nucleic Acids Res.*  
518 1997;25:3389–402.
- 519 60. Fozo EM, Makarova KS, Shabalina SA, Yutin N, Koonin E V, Storz G. Abundance of type I  
520 toxin-antitoxin systems in bacteria: searches for new candidates and discovery of novel families.  
521 *Nucleic Acids Res.* 2010;38:3743–59.
- 522 61. Tange O. GNU Parallel – The Command-Line Power Tool. ;login USENIX Mag. 2011;36:42–7.
- 523 62. R Core Team. R: A Language and Environment for Statistical Computing R Found. Stat.  
524 Comput. Vienna, Austria: R Foundation for Statistical Computing; 2015. <http://www.r-project.org>
- 525 63. Heiberger RM, Holland B. Statistical analysis and data display: An intermediate course with  
526 examples in R. 2<sup>nd</sup> Ed. New York: Springer New York; 2015.
- 527 64. Pohlert T. PMCMR: Calculate Pairwise Multiple Comparisons of Mean Rank Sums. 2015.  
528 <http://cran.r-project.org/package=PMCMR>
- 529 65. Martin M. Cutadapt removes adapter sequences from high-throughput sequencing reads.  
530 *EMBnet.journal* 2011;17:10.
- 531 66. Bolger AM, Lohse M, Usadel B. Trimmomatic: a flexible trimmer for Illumina sequence data.  
532 *Bioinformatics* 2014;30:2114–20.
- 533 67. Wood DE, Salzberg SL. Kraken: ultrafast metagenomic sequence classification using exact  
534 alignments. *Genome Biol.* 2014;15:R46.
- 535 68. Nurk S, Meleshko D, Korobeynikov A, Pevzner PA. metaSPAdes: a new versatile metagenomic  
536 assembler. *Genome Res.* 2017;27:824–34.

537 69. Roux S, Emerson JB, Eloë-Fadrosch EA, Sullivan MB. Benchmarking viromics: an *in silico*  
538 evaluation of metagenome-enabled estimates of viral community composition and diversity. PeerJ  
539 2017;5:e3817.

540 **Tables**

541 **Table 1. Accuracy and precision in the number of coding sequences**

| <b>Case</b>               | <b>Program</b> | <b>Accuracy<br/>(Slope)</b> | <b>Precision<br/>(R<sup>2</sup>)</b> |
|---------------------------|----------------|-----------------------------|--------------------------------------|
| <b>General</b>            | <i>VIGA</i>    | 1.027                       | 0.997                                |
|                           | <i>Prokka</i>  | 1.043                       | 0.996                                |
|                           | <i>RAST</i>    | 1.118                       | 0.979                                |
|                           | <i>RASTtk</i>  | 1.135                       | 0.982                                |
| <b>Archaeal viruses</b>   | <i>VIGA</i>    | 0.962                       | 0.990                                |
|                           | <i>Prokka</i>  | 0.991                       | 0.991                                |
|                           | <i>RAST</i>    | 0.821                       | 0.936                                |
|                           | <i>RASTtk</i>  | 1.036                       | 0.993                                |
| <b>Bacteriophages</b>     | <i>VIGA</i>    | 0.997                       | 0.997                                |
|                           | <i>Prokka</i>  | 0.983                       | 0.995                                |
|                           | <i>RAST</i>    | 0.982                       | 0.996                                |
|                           | <i>RASTtk</i>  | 1.015                       | 0.997                                |
| <b>Eukaryotic viruses</b> | <i>VIGA</i>    | 1.031                       | 0.997                                |
|                           | <i>Prokka</i>  | 1.050                       | 0.997                                |
|                           | <i>RAST</i>    | 1.136                       | 0.979                                |
|                           | <i>RASTtk</i>  | 1.151                       | 0.982                                |

542

543

544 **Table 2. Accuracy, precision and sensitivity of the different programs.** False Discovery Rate  
 545 (FDR) and False Negative Ratio (FNR) are used to describe errors in the precision and sensitivity.

| Case                      | Program       | F1 Score | Precision | Sensitivity | FDR (Type I error) | FNR (Type II error) |
|---------------------------|---------------|----------|-----------|-------------|--------------------|---------------------|
| <b>General</b>            | <i>VIGA</i>   | 0.945    | 0.940     | 0.950       | 0.060              | 0.050               |
|                           | <i>Prokka</i> | 0.924    | 0.917     | 0.931       | 0.083              | 0.069               |
|                           | <i>RAST</i>   | 0.853    | 0.844     | 0.862       | 0.156              | 0.138               |
|                           | <i>RASTtk</i> | 0.863    | 0.821     | 0.909       | 0.179              | 0.091               |
| <b>Archaeal viruses</b>   | <i>VIGA</i>   | 0.914    | 0.930     | 0.899       | 0.070              | 0.101               |
|                           | <i>Prokka</i> | 0.921    | 0.922     | 0.920       | 0.078              | 0.080               |
|                           | <i>RAST</i>   | 0.819    | 0.918     | 0.739       | 0.082              | 0.261               |
|                           | <i>RASTtk</i> | 0.910    | 0.894     | 0.927       | 0.106              | 0.073               |
| <b>Bacteriophages</b>     | <i>VIGA</i>   | 0.952    | 0.958     | 0.947       | 0.042              | 0.053               |
|                           | <i>Prokka</i> | 0.909    | 0.921     | 0.897       | 0.079              | 0.103               |
|                           | <i>RAST</i>   | 0.936    | 0.950     | 0.923       | 0.050              | 0.077               |
|                           | <i>RASTtk</i> | 0.934    | 0.929     | 0.939       | 0.071              | 0.061               |
| <b>Eukaryotic viruses</b> | <i>VIGA</i>   | 0.942    | 0.930     | 0.954       | 0.070              | 0.046               |
|                           | <i>Prokka</i> | 0.933    | 0.914     | 0.952       | 0.086              | 0.048               |
|                           | <i>RAST</i>   | 0.806    | 0.782     | 0.831       | 0.218              | 0.169               |
|                           | <i>RASTtk</i> | 0.820    | 0.760     | 0.889       | 0.240              | 0.111               |

546

547 **Table 3. Kruskal-Wallis  $p$ -values for the comparison between all different pipelines**  
 548 **considering the different viral types.**

| Case               | $p$                     |
|--------------------|-------------------------|
| Archaeal viruses   | $8.219 \times 10^{-5}$  |
| Bacteriophages     | $5.596 \times 10^{-28}$ |
| Eukaryotic viruses | $1.348 \times 10^{-46}$ |

549

550 **Figure legends**

551

552 **Figure 1. Correlation between the expected and observed number of coding sequences when**  
553 **considering (A) all known viral sequences, (B) archaeal viruses, (C) bacteriophages, and (D)**  
554 **eukaryotic viruses. Dotted line is a 1:1 line.**

555

556 **Figure 2. Percentage of non-informative annotations when processed in all programs for (A)**  
557 **all known viral sequences, (B) archaeal viruses, (C) bacteriophages, and (D) eukaryotic**  
558 **viruses. Dot indicates the average value of non-informative annotations and bars indicates the 95%**  
559 **confidence interval.**

560

561 **Figure 3. Percentage of non-informative annotations for the case study dataset when**  
562 **processed in all programs for (A) the case study dataset, (B) short contigs (<15 kb), (C)**  
563 **medium contigs (15 – 70 kb), and (D) long contigs (>70 kb). Dot indicates the average value of**  
564 **non-informative annotations and bars indicates the 95% confidence interval.**

565

566 **Figure 4. Flowchart of the VIGA pipeline. Orange rectangles represent the different steps of the**  
567 **program (among those, discontinuous-lined rectangles indicate optional steps; see main text). Red**  
568 **parallelograms indicate the relevant data that it is summarised in the output. Yellow rectangles with**  
569 **a wavy base stand for input and output files.**

570

571 **Figure 5. Flowchart of the decision tree algorithm. Blue rectangles represent steps in the decision**  
572 **tree. Orange and purple rectangles state optimal BLAST and HMMER solutions, respectively.**  
573 **Mustard coloured rectangles represent “hypothetical protein” decisions.**

574 **Additional files**

575

576 **Additional file 1. List of the viruses used for the validation test (Excel file)**



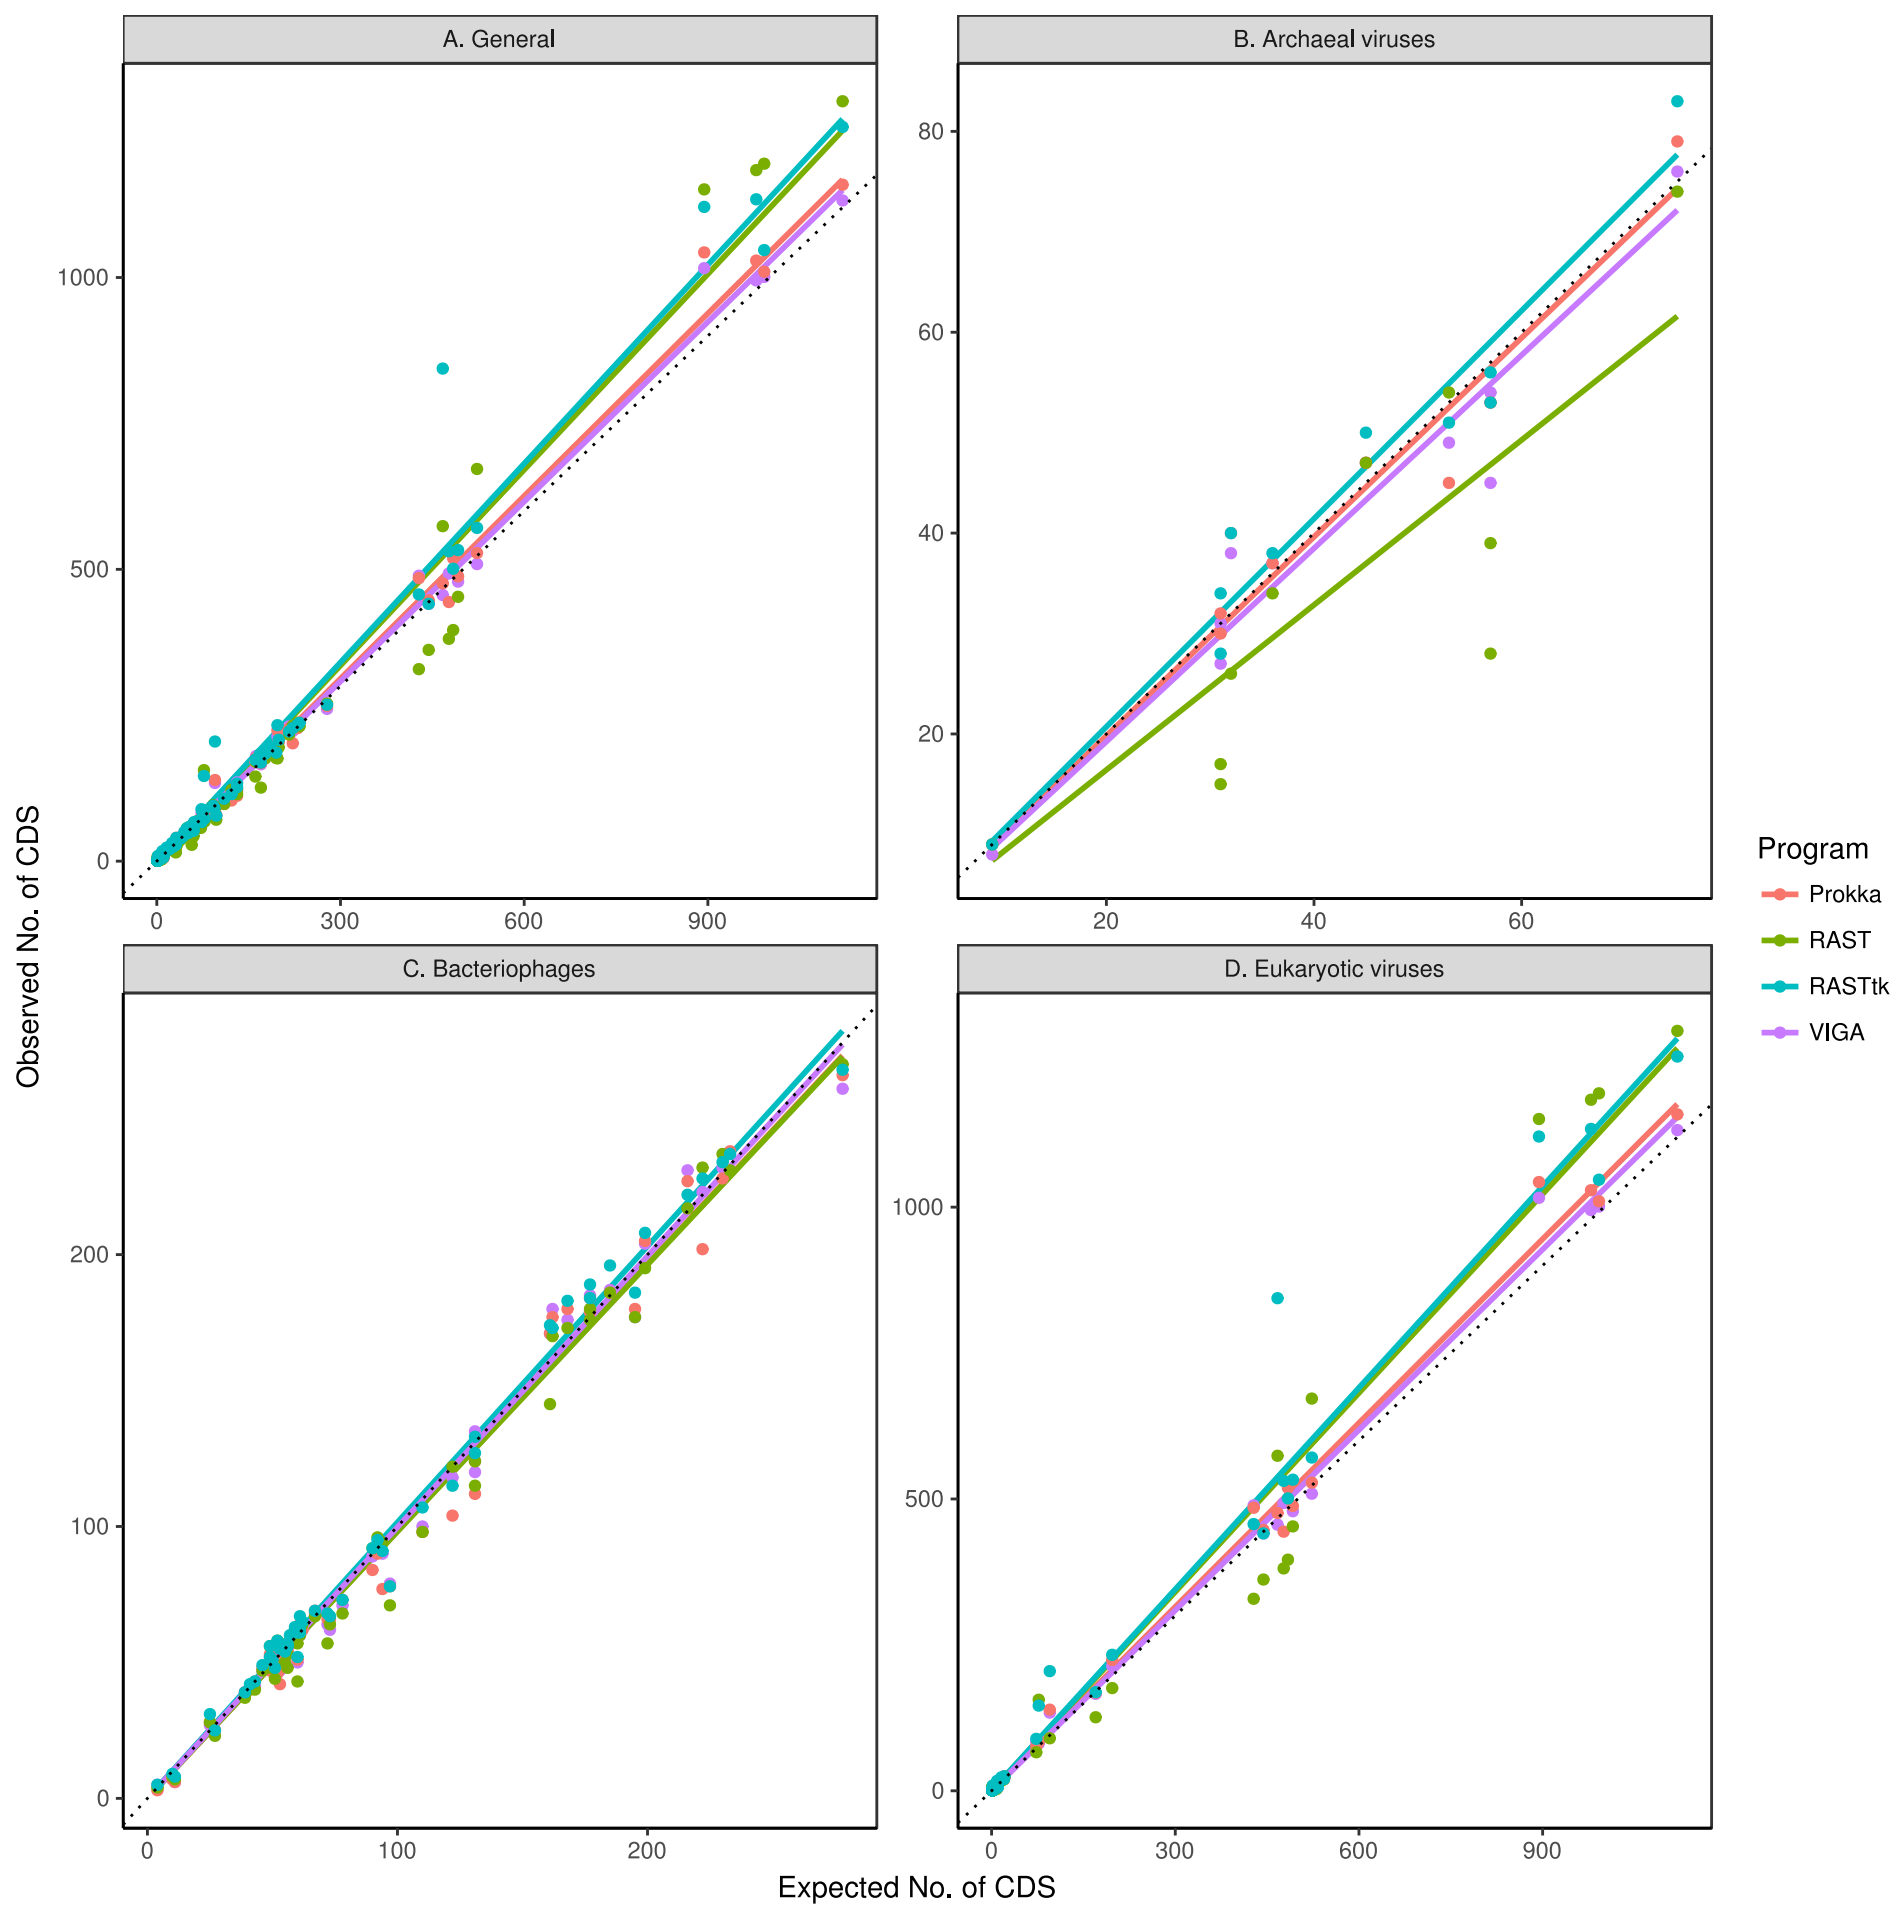

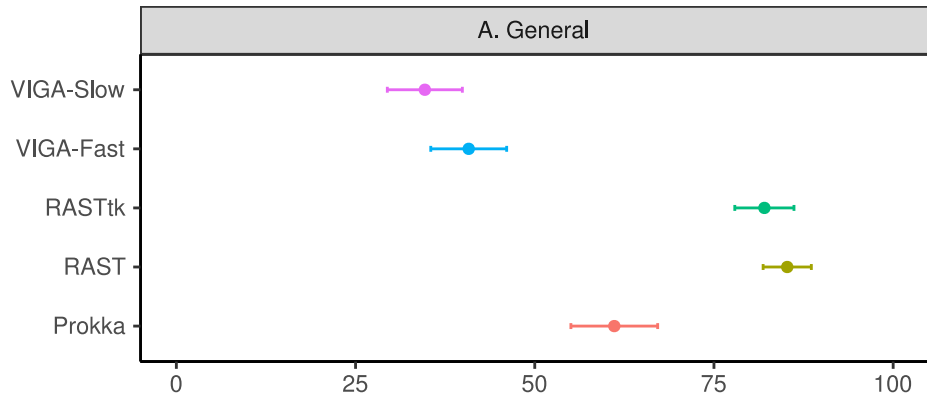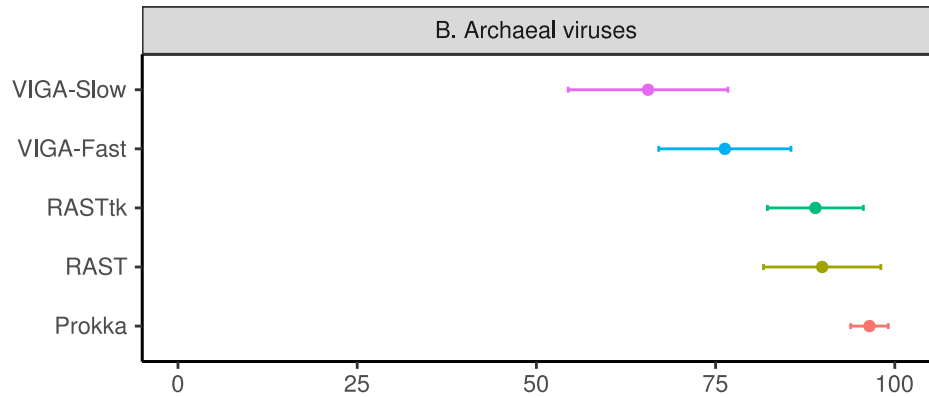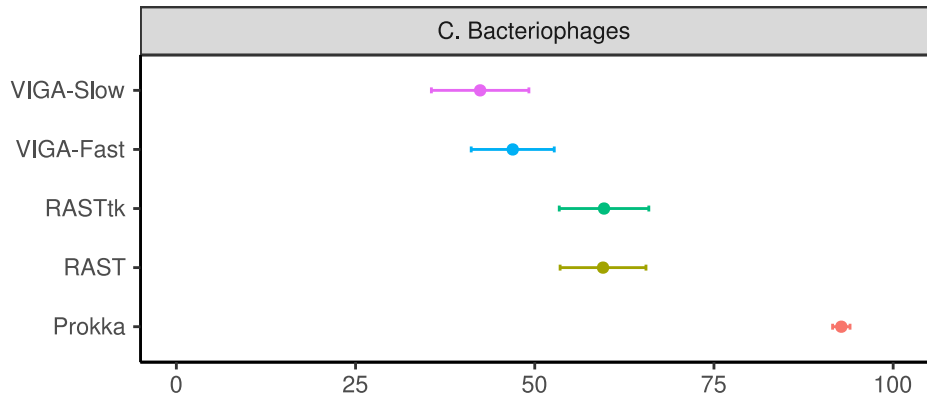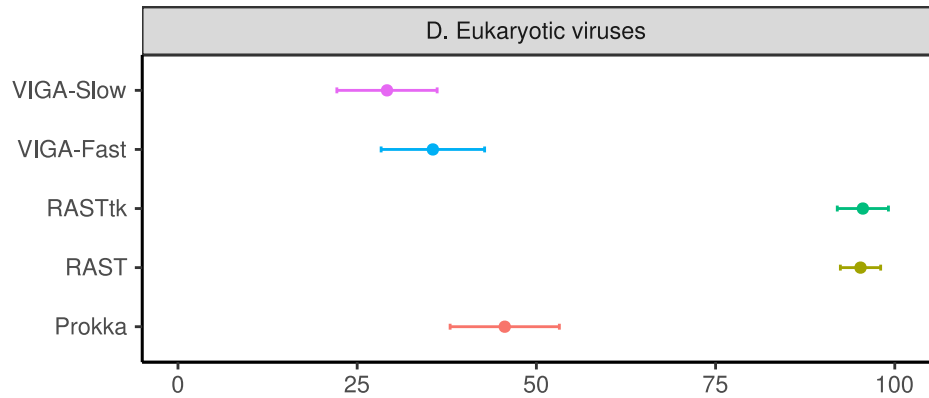

Percentage of non-informative annotations

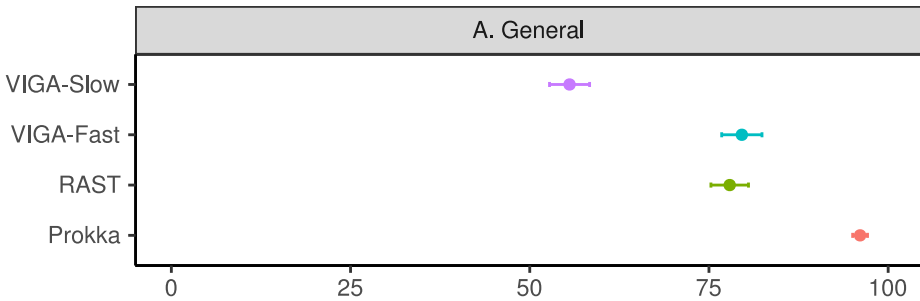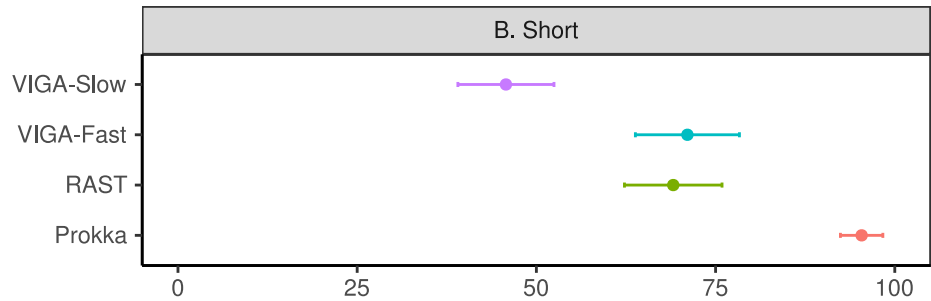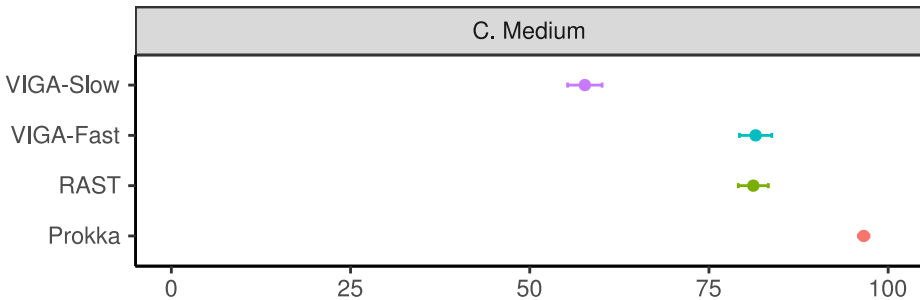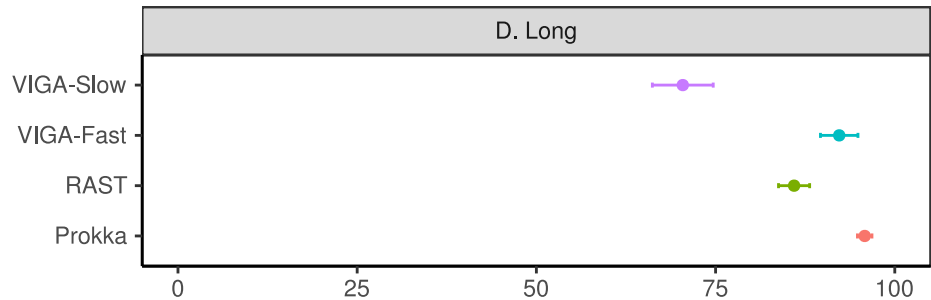

Percentage of non-informative annotations

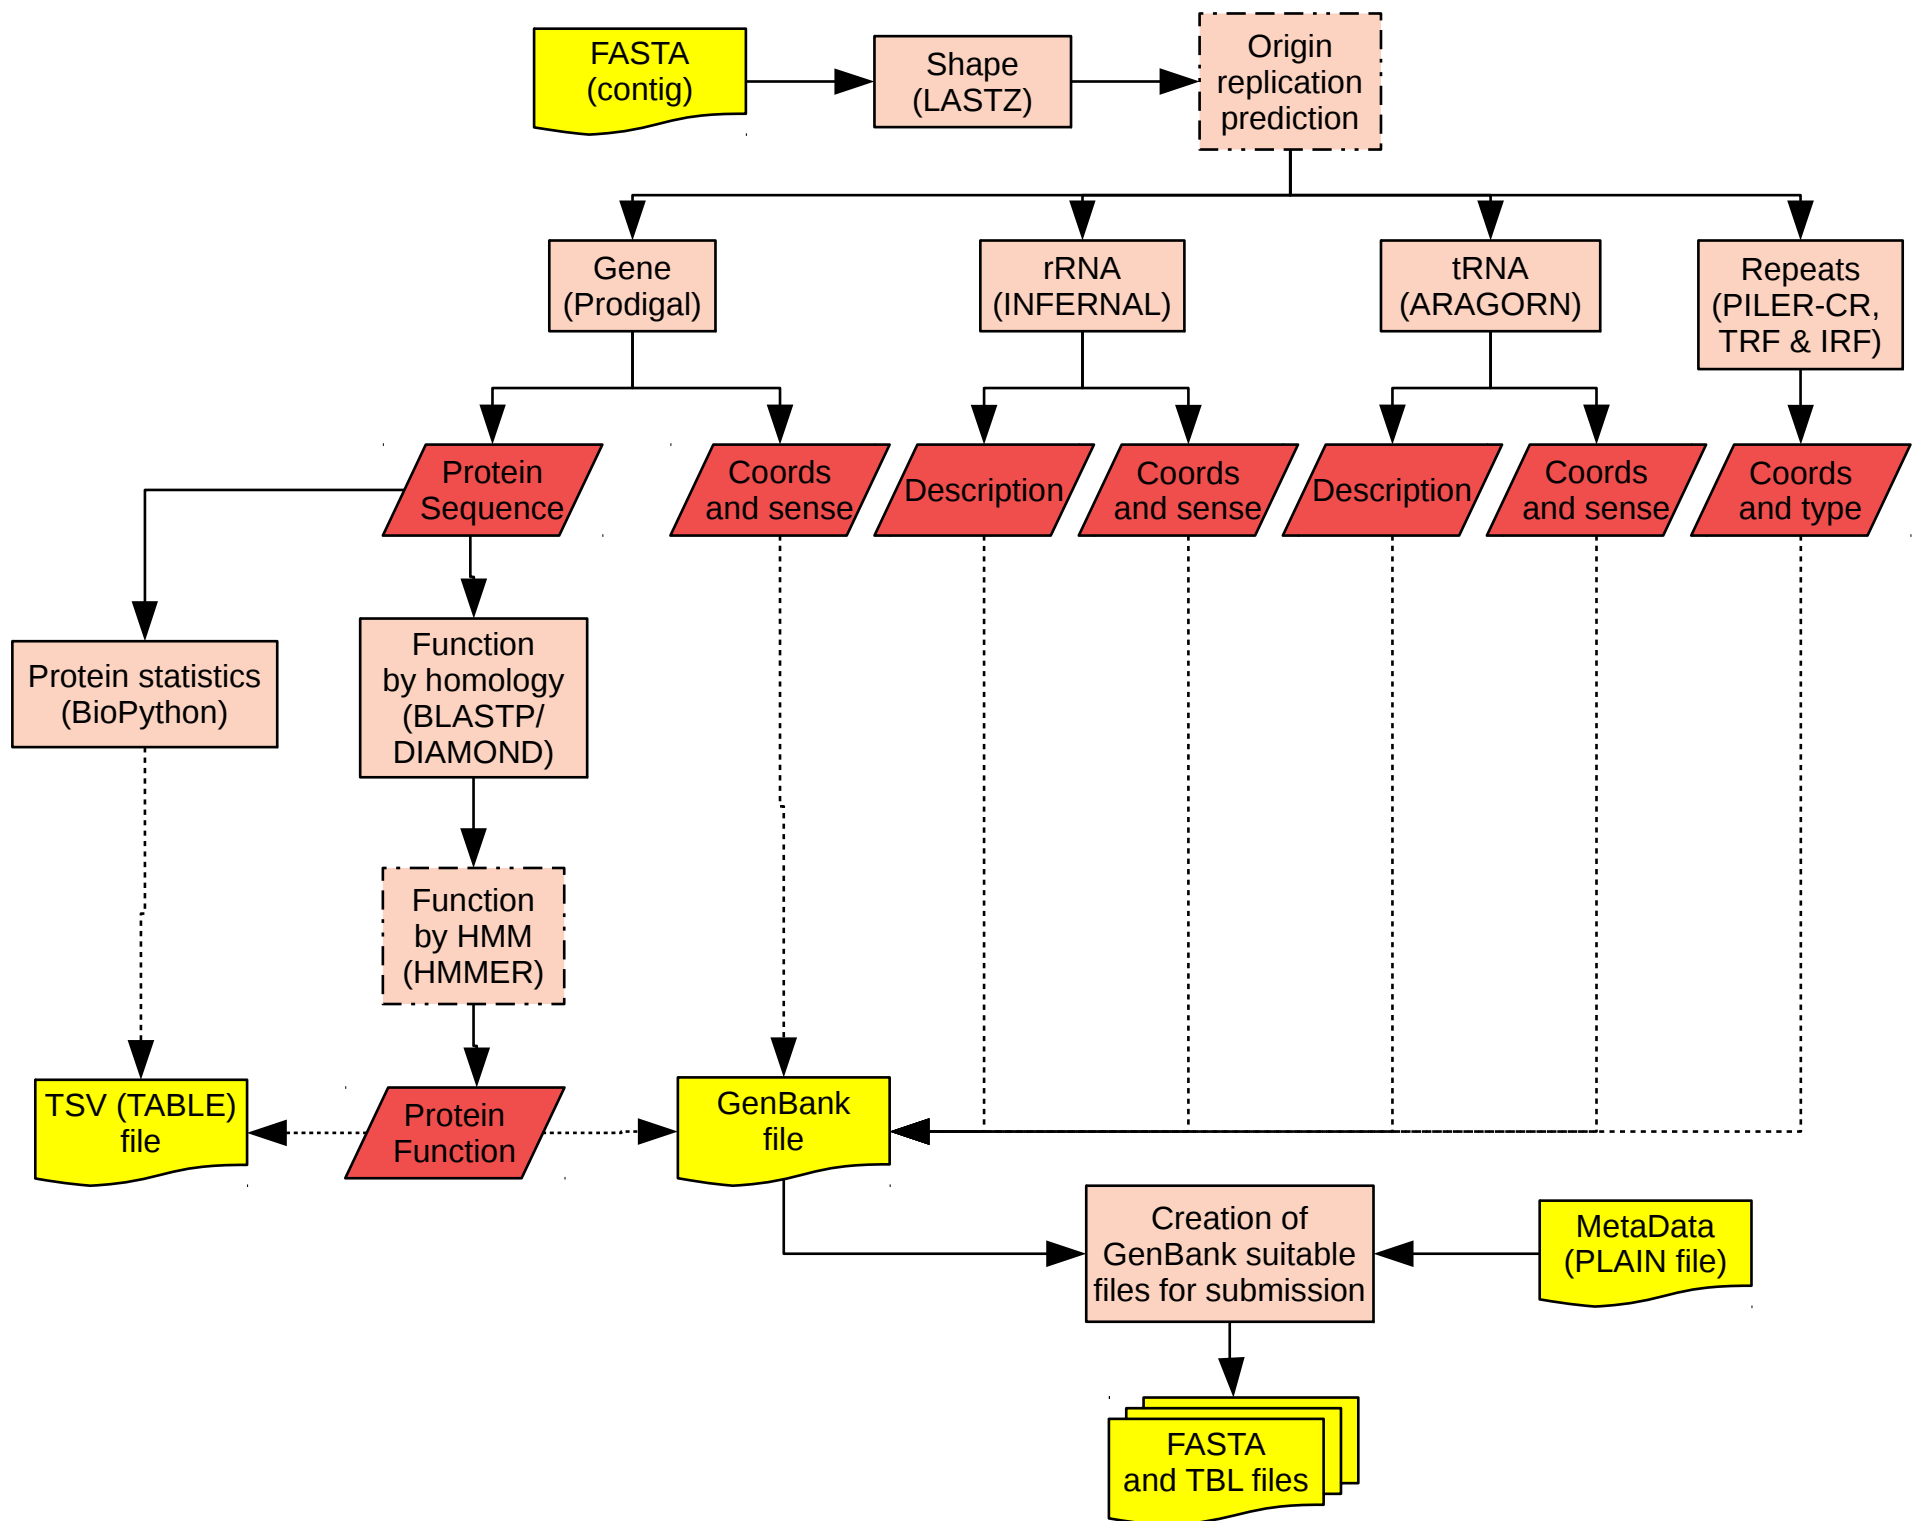

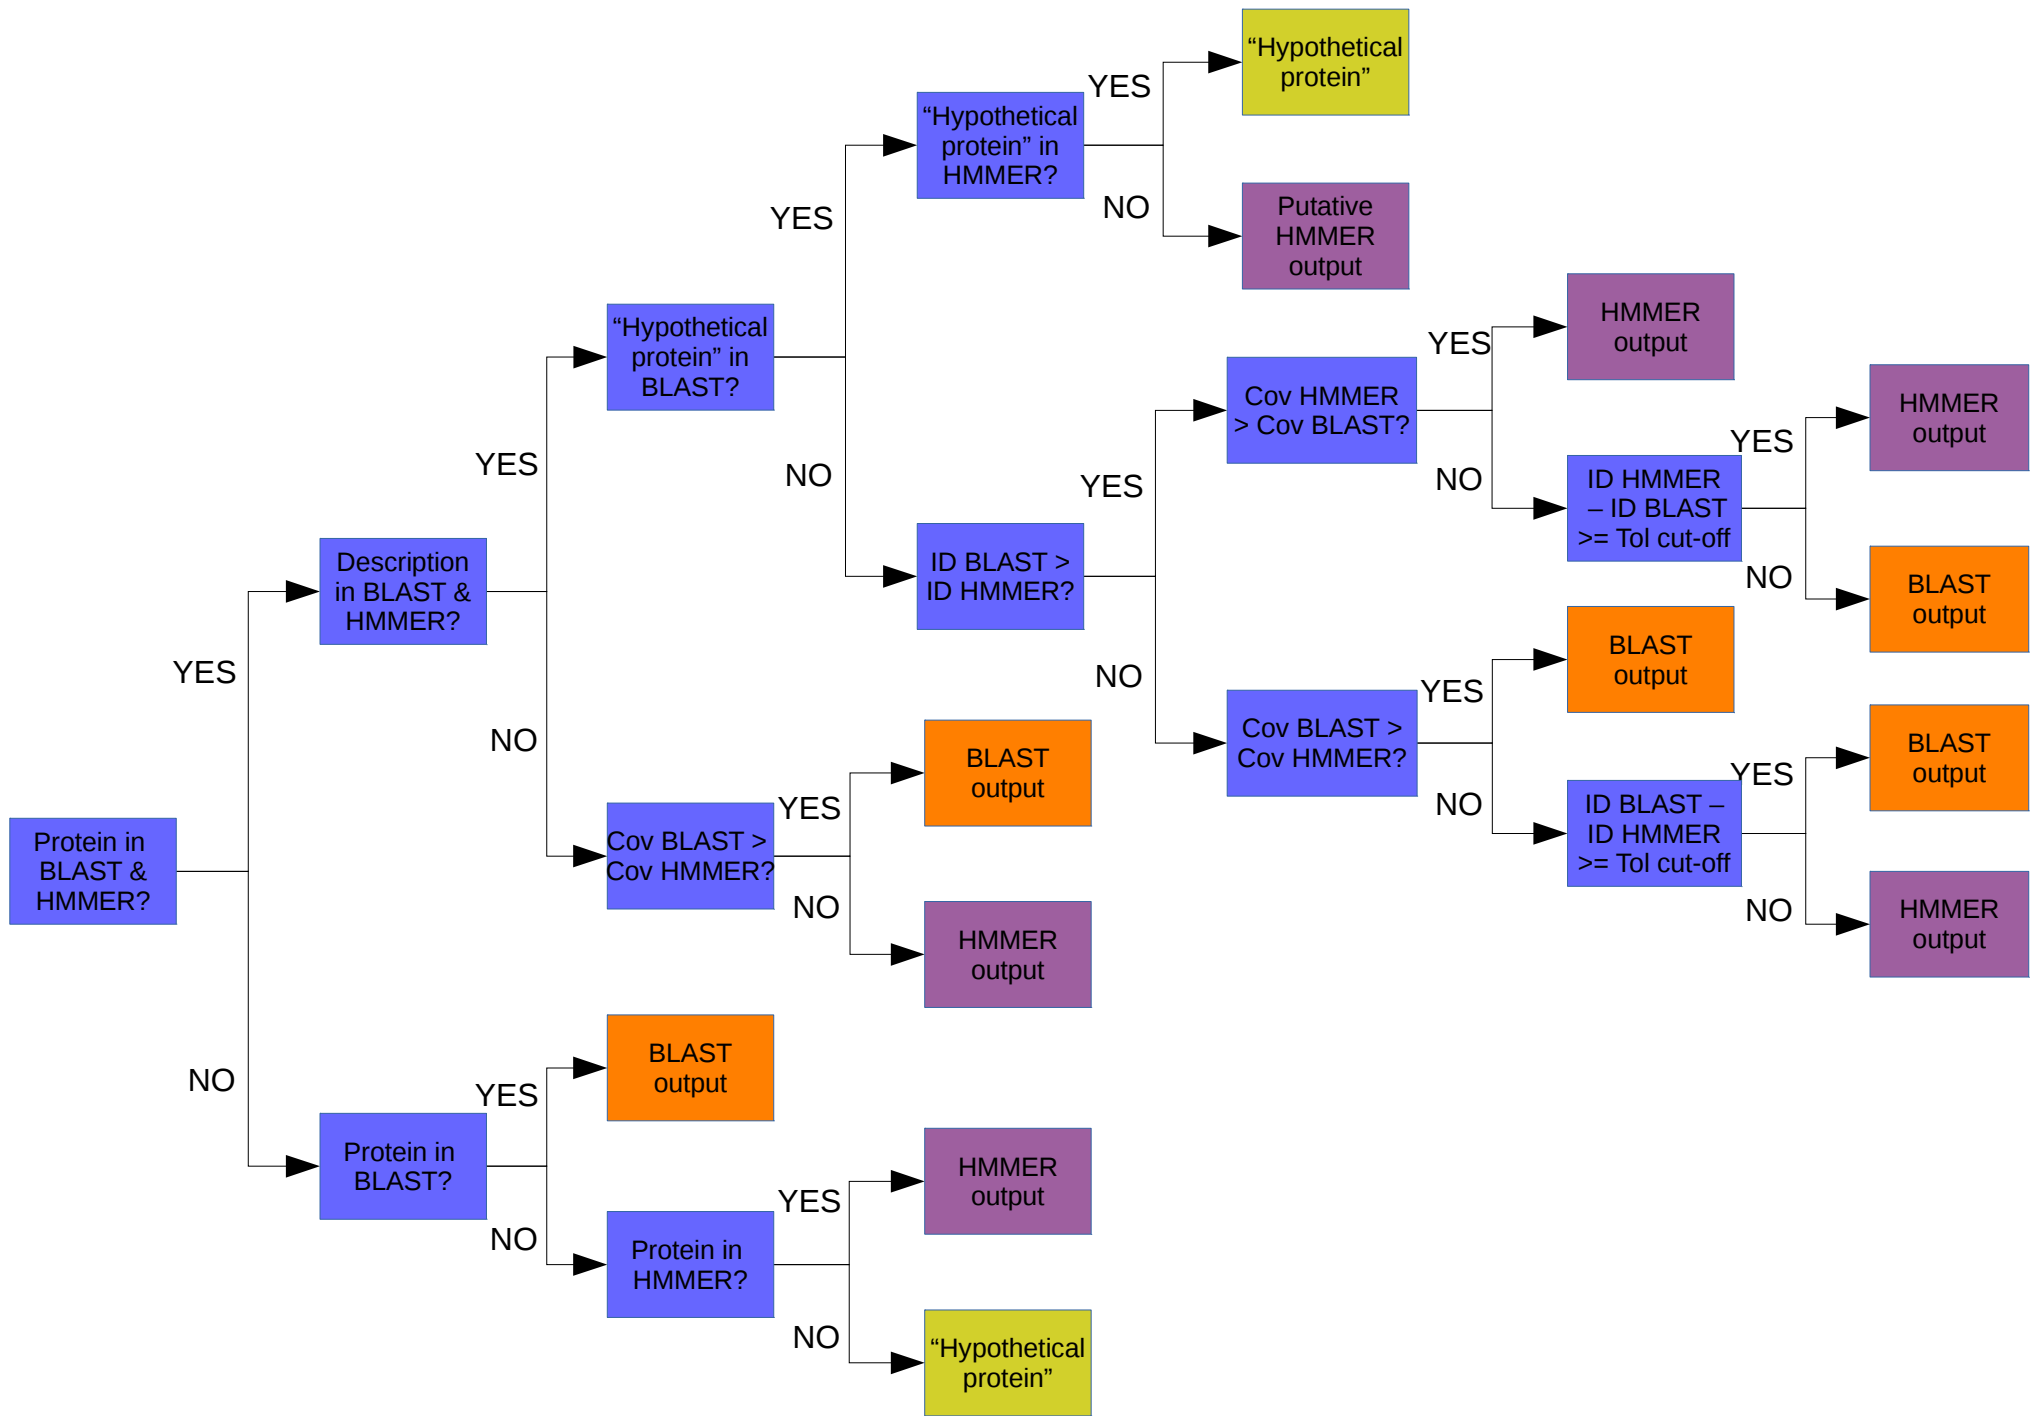

Source: https://www.biorxiv.org/content/biorxiv/early/2018/03/07/277509.full.pdf
